# Supplementary material
Source: Elsevier journal article supplement (https://www.sciencedirect.com/science/article/pii/S1889183720300763)
Supplement: mmc1 [file S1889183720300763:mmc1.doc]

# List of Investigators

**Study Group MMM18-SEFAC**

**Sociedad Española de Farmacia Familiar y Comunitaria**

Molinero, Ana; Adzet Panades, Elena; Aguilera Castro, Fernando; Aguiló Juanola, Miguel C.; Ainsa Sal del Rio, Patricia; Alejandre Dueñas, Ángel; Algaba Luque, Mª Carmen; Allué Blasco, José Luis; Alvarez Garcia Uribelarrea, Ana; Alvarez Gonzalez, Remedios; Álvarez Oltra, Javier; Alvarez Perez, Gonzalo; Álvarez Sainz de la Maza, Pilar; Andraca Iturbe, Leire; Andrés Garrido, Lucas David; Anguita Fernández, Mª Carmen; Arbelo Capote, Luisa Soledad; Arce Hidalgo, Concepción; Arque Barios, Josep Ramon; Arruti Guerrero, Lorea; Ayala Muñoz, Prado; Ayala Ortiz, Concepción; Badia Sala, Assumpció; Bagaria de Casanova, Guillermo; Baixauli Fernández, Vicente Javier; Balbuena García, Nuria; Baldeón Concepción, Marcelo; Baldó Gisbert, Alicia; Barrosa Vazquez, Manuela; Batlle Burch, Laura; Bayo Martín, Ana; Bellver Monzó, Otón; Beramendi Marturet, Lucia; Berdaguer Barbadillo, Belen; Boleda Relats, Xavier; Bonmati Castella, Adela; Borobio León, Álvaro; Bosqued Lacambra, Juana; Bravo Anaya, Mª Nuria; Briones Amor, Paula Mª; Brizuela Rodicio, Luis Alfonso; Brufau Bonet, M. Teresa; Bugella Altamirano, Elena; Busquets I Casso, Anna; Caelles Franch, Neus; Calatayud Gómez, Eva; Calduch Porta, Vicenç; Calleja Avellanal, Ignacio; Calo Abelleira, Rita; Cámara Ramos, Iker; Carbonell Brufau, Mercedes; Carmona Martín, Francisco Javier; Carrasco López, Sandra; Carré, Jose Maria; Casado, Borja; Castillo Caballero, Noelia; Castro Borges, María Jasmina; Castro López, Laura; Chacón Garcés, Mercedes; Chantada Abal, Francisco Javier; Chicano Vega, Susana; Cívico Criado, Francisco; Cobián Rodríguez, Mª Belén; Codesal Gervás, Tomás; Colom Rubí, Ramón; Comas I Bergua, Maria Teresa; Compairé Bergua, Ignacio; Córcoles Ferrándiz, María Edelmira; Corral Abad, Elvira; Cortés González, Lourdes; Cortiella, Carme; Cosín Borobio, Ana; Costa Mas, Jordi; Costales Suarez, Sandra; Couñago Lago, Ignacio; Cullell del Valle, Cristina; Darder Bover, Margarita; de la Matta Martín, Mª José; de la Rosa Lisa, Alicia; de Lozoya Elzaurdia, José F.; de Miguel Rekalde, Francisco Javier; de Sancho Marcos, Belen; del Carre López, Ana; del Cerro Ros, Irene; Delgado Gonzalez, Alejandra; Dellonder Frigole, Nuria; Díaz Álvarez, Alejandro; Díaz Jimenez, Cristina; Diego Martínez, Cristina; Dorta Álvarez, María Gema; Duran Lorente, Juan Carlos; Durban Armenteras, Clotilde; Elejaga Larrinaga, José Ramón; Escudero Alonso, Irene; Escudero Rivera, Irene; España García, Silvia; Espinosa González, Luis; Espinosa Suances, Antucho; Fernández Casado, María; Fernández Cordeiro, Marta; Fernandez Covacho, Silvia; Fernández Tapia, Mª Pilar; Fernández Veiga, Antonio; Fernández Veres, Mª del Loreto; Ferra Monserrat, Rosario; Ferran Lalanda, Enriqueta; Ferrer Estrela, Fernando; Fortunez Garea, Cristina; Fullana Alzamora, Coloma; Gabilondo Zelaia, Itxasne; Gallego García, Lola; Gandía Caballero, María de los Llanos; Garcia Bonet, Isabel; Garcia Colmenero, Martin; Garcia Martin, Diana; García Moreno, Luis; García Rodríguez, Patricia; Garcia Sanchez, Yolanda; Garcia Uribelarrea, Mª Adelina; Garre, Carlos; Gil Alegre, Teresa; Gil García, Modesta Inmaculada; Gil Pérez, Fernando; Giraldo Zarco, Elisa; Gómez Ivars, Jordi; Gómez Mateos Pérez, Magdalena; Gonzalez Alvarez, Emma; González López, Mariano; Gonzalez Martín, Marcos; González Moles, Germán Fernando; González Pérez, María Guadalupe; Gonzalez Sanchez, Darío;Guixé Simon, Xavier; Gutierrez López, Eulalia; Henarejos Sánchez, Siomar; Hernandez Cuvut, Narua Assumpcio Hernández Marrero, Mª Rosario; Hernández Martín, Mª Elena; Herrada Romero, Manuel; Infantes Costa, Herminia; Iracheta Todó, Montserrat; Iribarne, Marta; Ivanova Ivanova, Petya; Izuzquiza Montaner, Ana Rosa; Jaraiz Magariños, Irene; Jiménez García, María José; Jimenez Guillen, Mª Francisca; Jordana Gisbert, Rosa; Jornet Monreal, Lluisa; Justo Hernández, Alicia; Labat Casanova, Mª Pilar; Lage Piñón, Mª Montserrat; Lema Añon, Arancha; Lloret Gorgoll, Magdalena; Loayza López, María Antonieta; Lobato Rodriguez, Cristina; Lois González, María del Carmen; López Villodre, Pilar; López Anguas Sánchez, Cristina; Lorenzo Murillo, Rosa Maria; Lorenzo Picazo, Raquel; Lourés Vazquez, Paula; Luengo Aguilar, Teresa; Luis Amado, Ana Maria; Madriñan Batán, Inés Elena; Mahiques Mahiques, Maria Jose; Mallolas Jimenez, Judith; Marín Aurrekoetxea, Jaurne; Martin de la Cuesta, Rosa Maria; Martín Fernández, Silvia; Martín Oliveros, Adela; Martinez Alfonso, Marta Maria; Martinez de Dios, Mariana; Martinez Frances, Ana Belen; Martinez Pareja, Jose Antonio; Martinez Perez, Rocío; Martínez Pérez, Sebastián Ramón; Martinez Utrilla, Myriam; Martínez Reboredo Ferreiro, Natalia; Más Farre, Ángel; Medina Nohales, Marta; Melchor Hernández, Ana; Mendez Martin, Mª Bihilde; Menendez Martinez, Patricia; Mera Gallego, Inés; Mérida Gómez, Marta Lucía; Miñano Falcón, Purificación Amparo; Miralles López, Francisca; Miserachs, Anna; Molinero, Ana; Monllau Mayor, Lina; Monllor Corcoles, Blanca; Montalbán Soler, Luis; Montalva Beneyto, Gemma; Morales Espina, Mª Carmen; Moreno Gonzalez, Dolores; Moreno López, José Agustín; Mourín Pérez, Ana; Mud Castello, Sara; Muñoz Fernández, Purificación; Muñoz Garcia Heras, Laura; Muñoz Murillo, Carmen; Murillo Fernández, Mª Dolores; Murillo Fuentes, Mª Luisa; Nieto Masa, Ana Isabel; Niubò Aragüés, Eugènia; Novas, Marta; Ojeda Pichardo, Eva; Ortas Buil, Leticia; Ortega Ortega, Eduardo; Ortego Albarran, Concepción; Ortigosa Barbero, Paloma; Padilla Papaceit, Olga; Padilla Serrano, Francisco Javier; Palau Roig, Elena; Pallarés Valdés, Isabel; Palomo Peiro, Carmen; Pararols Valldaura, Cristina; Pascual Sánchez, Eduard; Pazos, Rosa; Penin Álvarez, Oscar; Peña Vera, Adama; Pérez Belda, Elena; Perez Ranchal, Juan Manuel; Perez Sanz, Cristina; Pérez Accino García, Marta; Pérez Ramos Hueso, Luis Alfonso; Peris Molina, María Teresa; Pernas Gomez, Maria Jesús; Perseguer Torregrosa, Zeneida; Piñeiro Gago, Olga María; Piqué Calafell, Tània; Pizarro Ortega, Ana Luisa; Plana Hernández, Sílvia; Plaza Zamora, Fco. Javier; Polanco Abad, Mª Luisa; Porras Fernandez, Francisco Manuel; Prado Hernández, Gemma; Prieto Alen, Sonia; Puche García, Nuria; Queiro Candal, Nerea; Ramirez Garcia, Jose; Ramón, Ana; Ramos Guerra, Silvina; Rañón García, Eva Maria; Represas Seoane, Maria del Mar; Requejo Pomar, Maria Angeles; Ricart Boronat, Àngela N. ; Ricart Cortés, Juan Antonio; Riera Cardelús, Elisabet; Robles Carvajal, José Cristóbal; Roca Albero, Pilar; Rodriguez Evora, Maria; Rodríguez Gamboa, Amaya; Rodríguez García, Isabel; Rodriguez Moncho, Mª José; Rodriguez Moreno, Ricardo; Rodriguez Armijo Sánchez, Ignacio; Roig Martínez, Marta; Romero Caamaño, Vanessa; Romero Toledo, Lourdes; Ros Simó, Clara; Rosinach Bonet, Jordi; Rouco Martínez, María del Carmen; Ruiz de Azua, Mª Jose; Ruiz Lozano, Francisca; Sala Bailén, Fernando; Sala Domenech, Gloria; Sanabria Pérez, Modesto José; Sánchez Luengo, Francisco; Sánchez Negrín, Eva Auxiliadora; Sánchez Priego, Julia; Fuentes Machuca, Julio Sánchez; Sanchis Montoro, Farmacia Aielo Cb; Sanfeliu Soto, Enrique; Santos Romero, Pilar; Sanz Estalayo, Andrés; Satué de Velasco, Eduardo; Savova Kirpecheva, Mariya; Secanell Roca, Josep Maria; Segarra Vidal, Vicenç Tomás; Senra Grande, Fernando; Sierra Cinos, Jose Luis; Silvestre Ibor, Francisco Javier; Soriano Ortega, Jorge; Soriano Sanchez, Pedro Jose; Soriano Santigosa, Marta; Sorrigueta Gredilla, Casilda; Subirana Corona, Carmina; Tormo Marti, Joaquín; Torrell Sorio, Montserrat; Torres Torres, Mª Luisa; Tous Trepat, Salvador; Trape Pujol, Josep; Val Pérez, Marta; Vallcanera Calatayud, Josep Lluis; Vallejo Ruiz, Ainara; Vaucouloux Esqué, Cristina; Vázquez Blanco, Verónica; Vázquez Mondelo, Mª del Pilar; Vega Rodríguez, María del Rocío; Vergoñós Gili, Alfonso; Vergoños Tomás, Ares; Vidal Gotanegra, Mª Teresa; Vidal Prujà, Lidia; Vila Rodriguez, Jose Antonio; Vilariño de la Rosa, Rober; Villasuso Cores, Benigna; Vitoria Mulet, Gema; Viver Fabregó, F. Xavier; Vives Grimalt, Maria Pilar; Zarauz Céspedes, Ignacio; Zuriaga Cosín, María Fé.

**Study Group MMM18-CEU**

**Universidad Cardenal Herrera-CEU; CEU Universities**

**Alfara del Patriarca / Castellón; Spain**

Aguado Sanchis, Rocío; Almiñana Bas, Juan Francisco; Álvaro Roures, María; Ariño Miguel, Iris; Aspas Requena, Marina; Baixauli Grau, Julia; Baldwin, Sophie; Barrés Fernández, Paula; Bella Benlloch, Meritxell; Benau, María; Bosch Romeu, Anna; Briz Giménez, Pablo; Buades Gómez, Tomás; Cárcel Corella, Álvaro; Carreras Gamón, Blanca; Carricondo Martínez, José Miguel; Chillarón Martí, Marta; Coín Camarero, Aroa; Corredor Belmar, Alejandro; Criado Miranda, Miguel Ángel; Darós, Paula; de Berardinis Moreno, Bettina; El Bachouti Khalil, Younes; Elbal Pérez, Cristina; Escudero, Judith; Estévez Eijó, Alejandra; Fanega, Josefa; Ferrando, Laura; Fonseca de Jesús, Silva, Carolina; Fuertes Cortés, Laura; García de la Chica, Ángela María; García Martí, José; García Teillard, Damián; García Zurita, Amada; Gheryb, Amal; Gil Alós, Daniel; Gomar Mascarell, Julia; Gomis Azorín, Sonia; Grima López, Mónica; Guevara, Natalia; Guijarro Torrente, Pilar; Jiménez Mauri, José Manuel; Lafuente López, Nuria; Lara Rubio, Miriam; Lewis Gutiérrez, María; lllarramendi Esteban, Jorge; Llorens Marcos, Gisela; López de Turiso Giner, Paula; López-Peláez Hamann, Lucía; Lorente Polo, Joaquín; Maqueda Mateu, Clara; Martínez Caravaca, María de los Ángeles; Martínez Estévez, María; Martínez Parra, Irene; Martínez Pina, Lei; Mas Clara; Miguel Gutiérrez, María; Moncho, Laura; Monllor Córcoles, Roque; Morell Vila, Carlos; Moreno Royo, Lucrecia; Moya Fernández, Paula; Muñoz Colacio, Isabel; Muñoz Jiménez, Patricia; Murillo Alejano, Elena; Navalón Blasco, Samuel; Negro González, Ana; Oduro, Christiana; Olmo Cortinas, Beatriz; Ortells Salvador, Irene; Ortiz Sánchez, Celia; Peiró, Rafael; Pérez, Jorge; Pomarés, Ricardo; Raimundo Vicioso, Jorge; Rodilla Sala, Enrique; Rodilla Usach, Inma; Ruiz Gámez, Carmen; Ruiz Palau, Paula; Saéz Enguidanos, Vicente; Sala Segura, Anna; Sánchez Cuchillo, Enrique; Sánchez Petroche, Dylan; Santos Huerta, Elena; Segura Sanjuán, Laura; Selfa Mira, Ariadna; Serra Manclús, Aurora; Serrano Torres, Pablo; Sevillà, Laura; Sierra Burgos, Sara; Simón, Mª José; Solé Delgado, Marta; Soler Sánchez, Cristina; Soler Sánchez, Cristina; Soriano Sanchis, Elena; Talens García, Elena; Tomás Iborra, Ainhoa; Torres Pérez, Nuria; Veintimilla Paños, Emilio; Vieco Olalla, Eduardo;

**Study Group MMM18-SEHLELHA**

**Sociedad Española de Hipertensión Arterial - Liga Española para la lucha contra la Hipertensión Arterial**

Aguado, Rocío; Álvarez García, Gema; Álvaro Roures, María; Andrés Plumed, Pilar; Ángel García, Karen Valeria; Blanco Almazán, Carmen; Casanovas Benedicto, Alejandro; Casaña, Amparo; Cebriá Donat, María Dolores; Cejalvo, Gemma; de Tredern, Prisca; de Zabala Iborra, Irune; Fernández Cornejo, Dolores; Fuertes Cortés, Laura; García Castilla, Alba; García García, Antonio; García Recio, Pilar; García Zurita, Amada; Gea Roig, Laura; Gimeno Solomando, Carla; Gijón Conde, Teresa; Guijarro Torrente, Pilar; Huélamo, Natalia; Ibáñez Cummins, Ciara; Igual Ruiz, Adrián; Jorge Bravo, Teresa; Lahuerta, Lourdes; Lewis Gutiérrez, Marina; López Hernández, Jesús Javier; López-Peláez Hamann, Lucía; Lupiañez Martínez, Álvaro; Madrid Reques, Gema; Maqueda Mateu, Clara; Marín Arroyo, Manuel José; Martínez Ridao, Antonio; Mas Lozano, Clara; Miguel Gutiérrez, María; Mires Melero, Adrián; Negro González, Ana; Osca Oliver, Alexandra; Pascual Pascual, Alina; Peña Gallo, Gemma; Pérez Manchón, David; Pérez Santosolmo, Raquel; Plaza Rivera, Sara; Requena Hernández, Ana; Rodríguez Martin-Millanes, Carmen; Rodríguez Sánchez, Alba; Ruiz Gámez, Carmen; Sainz Martínez, David; Sainz Sánchez, Avelino; Sánchez Ródenas, Maravillas; Santonja Calderón, Ángela; Santos Huerta, Elena; Serra Manclús, Aurora; Serrano Torres, Pablo; Simón Martínez, Mª José; Torner Rodrigo, José Luís; Rubio González, Esther; Valls Roca, Francisco; Vañó Frías, Ana; Vidal Moll, Claudia; Vieco Olalla, Eduardo; Villalba Severiche, Paula.
